# Supplementary material
Source: PubMed Central journal article supplement (PMC6508085)
Supplement: NIHMS1023137-supplement-ESI.pdf [file NIHMS1023137-supplement-ESI.pdf]

## Supplementary Information

# Synthesis and Application of the Blue Fluorescent Amino Acid L-4-Cyanotryptophan to Assess Peptide-Membrane Interactions<sup>†</sup>

Kui Zhang<sup>a, ‡</sup>, Ismail A. Ahmed<sup>b, ‡</sup>, Huong T. Kratochvil<sup>a</sup>, William F. DeGrado<sup>a</sup>, Feng Gai<sup>c, \*</sup>, Hyunil Jo<sup>a, \*</sup>

<sup>a</sup>Department of Pharmaceutical Chemistry, University of California, San Francisco, CA 94158, United States; <sup>b</sup>Department of Biochemistry and Biophysics and <sup>c</sup>Department of Chemistry, University of Pennsylvania, Philadelphia, Pennsylvania 19104, United States

<sup>‡</sup>These authors contributed equally

\*Corresponding authors: [hyunil.jo@ucsf.edu](mailto:hyunil.jo@ucsf.edu) (H.J.) and [gai@sas.upenn.edu](mailto:gai@sas.upenn.edu) (F.G.); Tel.: +1-215-913-7838 (H.J.); +1-215-573-6256 (F.G.)

## Table of Contents

### Experimental Section

|                                                                                                                    |            |
|--------------------------------------------------------------------------------------------------------------------|------------|
| General.....                                                                                                       | S3         |
| Synthesis of N-acetyl amino ester <b>5</b> .....                                                                   | S3         |
| Synthesis of N-acetyl amino acid <b>6</b> .....                                                                    | S3         |
| Synthesis of Synthesis of L-4CN-Trp <b>7</b> and Fmoc-L-4CNTrp <b>8</b> .....                                      | S4         |
| Determination of optical purity.....                                                                               | S5         |
| Solid-phase peptide synthesis of 4CN-Trp-pHLIP .....                                                               | S5         |
| Solid-phase peptide synthesis of Ac-Gly-L-4CN-Trp-Gly .....                                                        | S6         |
| Cell Culture.....                                                                                                  | S6         |
| Cell Imaging.....                                                                                                  | S6         |
| Preparation of large unilamellar vesicles (LUVs): .....                                                            | S7         |
| Fluorescence measurements.....                                                                                     | S7         |
| Förster distance calculation.....                                                                                  | S7         |
| Data Fitting.....                                                                                                  | S8         |
| <b>Table S1.</b> Summary of reported synthesis of 4CN-Trp and its derivatives.....                                 | S9         |
| <b>Figure S1.</b> HPLC profile of FDAA derivatized racemic and L-4CN-Trp.....                                      | S10        |
| <b>Figure S2.</b> Normalized fluorescence spectrum of L-4CN-Trp and absorption spectrum of DiO.....                | S11        |
| <b>Figure S3.</b> Effect of pH on L-4-CN-Trp Fluorescence Intensity.....                                           | S11        |
| <b>Figure S4.</b> Normalized fluorescence spectra of mixtures of LUVs and 4CN-Trp-pHLIP.....                       | S12        |
| <b>Figure S5.</b> <i>E. coli</i> growth inhibition assay.....                                                      | S12        |
| <b>Figure S6.</b> HPLC profile of L-4CN-Trp <b>7</b> .....                                                         | S13        |
| <b>Figure S7.</b> CD spectrum of L-4CN-Trp <b>7</b> .....                                                          | S13        |
| <b>Figure S8.</b> HPLC profile of the synthesized 4CN-Trp-pHLIP.....                                               | S14        |
| <b>Figure S9.</b> HPLC profile of the synthesized Ac-Gly-4CN-Trp-Gly .....                                         | S14        |
| <b>Copies of <sup>1</sup>H &amp; <sup>13</sup>C NMR spectra of <b>5</b>, <b>6</b>, <b>7</b>, and <b>8</b>.....</b> | <b>S15</b> |
| <b>References.....</b>                                                                                             | <b>S19</b> |

## Experimental Section

**General.** All reagents were used as received from commercial sources. Reactions were monitored through thin layer chromatography (TLC) on 0.25-mm SiliCycle silica gel plates and visualized under UV light. Flash column chromatography (FCC) was performed using Combiflash®Rf + Lumen UV-VIS/ELSD. NMR spectra were recorded using Bruker Avance-300 calibrated to CD<sub>3</sub>OD (3.31 and 49.0 ppm for <sup>1</sup>H and <sup>13</sup>C NMR spectra, respectively), (CD<sub>3</sub>)<sub>2</sub>CO (2.05 ppm for <sup>1</sup>H and 29.8, 206.3 ppm <sup>13</sup>C NMR spectra, respectively), D<sub>2</sub>O (4.79 ppm for <sup>1</sup>H) as the internal reference. <sup>1</sup>H NMR spectral data are reported in terms of chemical shift (δ, ppm), multiplicity, coupling constant (Hz), and integration. <sup>13</sup>C NMR spectral data are reported in terms of chemical shift (δ, ppm). The following abbreviations indicate the multiplicities: s, singlet; d, doublet; t, triplet; q, quartet; m, multiplet. Optical rotation was measured on a Jasco P2000 polarimeter and CD experiment was performed on a Jasco J-810 spectropolarimeter.

**Synthesis of N-acetyl amino ester 5.** To a solution of amino ester **4**<sup>1</sup> (10.3 g, 40.0 mmol) in dry DCM (300 mL) under inert atmosphere at 0 °C were added dropwise and successively Et<sub>3</sub>N (11.1 mL, 3.0 equiv) and acetyl chloride (3.2 mL, 1.1 equiv). The reaction mixture was stirred at 0 °C for 1 h and then allowed to stir for overnight at rt. The solution was quenched with a solution of sat. aq. NaHCO<sub>3</sub> and the resulting mixture was extracted with ethyl acetate. The combined organic layers were washed with brine, dried over Na<sub>2</sub>SO<sub>4</sub>, and concentrated under reduced pressure. The residue was purified by the column chromatography using CombiFlash®Rf + Lumen UV-VIS/ELSD (Teledyne ISCO) and a RediSep column [silica 120 g (60-Å pore size, 20–40 μm)] to provide the N-acetyl amino ester **5** (11.0 g, 92%). Ethyl 2-acetamido-3-(4-cyano-1H-indol-3-yl)propanoate **5**: Pale yellow solid; *R*<sub>f</sub> = 0.52 (hexane/EtOAc, 3:1); <sup>1</sup>H NMR (300 MHz, CD<sub>3</sub>OD) δ 7.68–7.65 (m, 1H), 7.46–7.43 (m, 1H), 7.32 (s, 1H), 7.24–7.19 (m, 1H), 4.81 (dd, *J* = 6.7, 8.3 Hz, 1H), 4.10 (q, *J* = 7.1 Hz, 2H), 3.55 (dd, *J* = 6.4, 14.7 Hz, 1H), 3.36 (dd, *J* = 8.2, 14.7 Hz, 1H), 1.95 (s, 3H), 1.14 (t, *J* = 7.1 Hz, 3H); <sup>13</sup>C NMR (75 MHz, CD<sub>3</sub>OD) δ 172.1, 171.8, 136.9, 127.0, 126.4, 125.5, 120.7, 119.2, 116.4, 109.4, 100.6, 60.8, 53.7, 26.7, 20.9, 12.9.

**Synthesis of N-acetyl amino acid 6:** A mixture of the ester **5** (4.8 g, 16 mmol) in ethanol (50 mL) and LiOH (3.0 equiv, 1 M solution) stirred at rt overnight. The ethanol was evaporated in vacuo. The residue was diluted with water (50 mL), acidified to pH 2 using aqueous HCl (1N), and extracted with ethyl acetate. The

combined organic phases were washed with NaHCO<sub>3</sub>, brine and concentrated under reduced pressure to yield the acid (3.86g, 89%). 2-acetamido-3-(4-cyano-1H-indol-3-yl)propanoic acid **6**: Pale yellow solid; *R*<sub>f</sub> = 0.30 (DCM/Methanol, 10:1); <sup>1</sup>H NMR (300 MHz, CD<sub>3</sub>OD) δ 7.68–7.65 (m, 1H), 7.46–7.38 (m, 1H), 7.38 (s, 1H), 7.23–7.18 (m, 1H), 4.81 (dd, *J* = 5.1, 8.3 Hz, 1H), 3.63 (dd, *J* = 5.1, 15.1 Hz, 1H), 3.36 (dd, *J* = 8.4, 15.1 Hz, 1H), 1.93 (s, 3H); <sup>13</sup>C NMR (75 MHz, CD<sub>3</sub>OD) δ 173.7, 171.8, 136.9, 126.9, 126.4, 125.5, 120.7, 119.2, 116.4, 109.7, 100.5, 53.2, 26.8, 21.0.

**Synthesis of L-4CN-Trp 7 and Fmoc-L-4CN-Trp 8**: Compound **6** (0.51 g, 2.0 mmol) was dissolved in PBS buffer solution (0.1 M, 25 mL) containing CoCl<sub>2</sub>•H<sub>2</sub>O (0.125 mM) at pH 8.0. Amano acylase (0.5 g, >30,000 U/g) was added with stirring. The mixture was placed in a shaker at 37 °C for 48 h and then quenched by adjusting the pH to 5 with 1M HCl solution. After centrifugation, the precipitate was isolated and lyophilized to obtain crude L-4CN-Trp **7**, which was subsequently used in the next step without purification. A small amount of sample was isolated by RP-HPLC for analytical analysis, whose spectroscopic data is in good agreement with literature values.<sup>2</sup> (S)-2-amino-3-(4-cyano-1H-indol-3-yl)propanoic acid **7**, white solid; <sup>1</sup>H NMR (300 MHz, D<sub>2</sub>O + 100 mM DCl) δ 7.42 (d, *J* = 8.01 Hz, 1H), 7.18 (d, *J* = 7.2 Hz, 1H), 7.11 (s, 1H), 6.94 (t, *J* = 7.89 Hz, 1H), 4.06 (dd, *J* = 5.6, 9.6 Hz, 1H), 3.31 (dd, *J* = 5.6, 15.3 Hz, 1H), 2.97 (dd, *J* = 9.6, 15.3 Hz, 1H); <sup>13</sup>C NMR (75 MHz, D<sub>2</sub>O + 100 mM DCl) δ 170.9, 136.2, 128.5, 126.3, 125.2, 121.3, 119.8, 117.4, 105.7, 98.9, 53.4, 25.4; HRMS (ESI) *m/z* 230.0909 [(M<sup>+</sup>H)<sup>+</sup>]; calcd for C<sub>12</sub>H<sub>13</sub>N<sub>3</sub>O<sub>2</sub><sup>+</sup> (M<sup>+</sup>H)<sup>+</sup>: 230.0930]; [*α*]<sub>D</sub><sup>25</sup> = -209.64 (c = 2.5 mg/mL, in 1 M HCl).

The aforementioned crude **7** was dissolved in an aqueous Na<sub>2</sub>CO<sub>3</sub> solution (0.1 M, 40 mL) followed by the addition of 9-fluorenylmethyl succinimidyl carbonate (0.67 g, 2.0 mmol) in THF (20 mL). The mixture was stirred for 2 h at rt. THF was removed under vacuo and the crude mixture was washed with Et<sub>2</sub>O. The pH of the aqueous layer was adjusted to 2 using 3 M aqueous HCl and was extracted with DCM. The organic extracts were combined and washed with brine, dried over Na<sub>2</sub>SO<sub>4</sub> and concentrated *in vacuo*. The residue was purified by the column chromatography to yield the product (280 mg, 62% of the theoretical yield over two steps). (S)-2-(((9H-fluoren-9-yl)methoxy)carbonyl)amino)-3-(4-cyano-1H-indol-3-yl)propanoic acid **8** Pale yellow solid; *R*<sub>f</sub> = 0.20 (DCM/methanol, 10:1); <sup>1</sup>H NMR (300 MHz, (CD<sub>3</sub>)<sub>2</sub>CO) δ 10.74 (s, 1H), 7.86–7.84 (m, 2H), 7.78–7.75 (m, 1H), 7.67–7.64 (m, 2H), 7.55–7.50 (m, 2H), 7.43–7.38 (m, 2H), 7.32–7.24 (m, 3H), 6.88 (d, *J* = 8.0 Hz, 1H), 4.81–

4.73 (m, 1H), 4.28–4.18 (m, 3H), 3.77–3.71 (m, 1H), 3.50–3.42 (m, 1H);  $^{13}\text{C}$  NMR (75 MHz,  $(\text{CD}_3)_2\text{CO}$ )  $\delta$  172.8, 156.1, 144.1, 141.1, 136.9, 127.6, 127.4, 127.0, 126.7, 125.7, 125.3 (2C), 121.1, 119.9, 119.3, 116.7, 110.5, 101.4, 66.3, 54.6, 47.0, 27.0. HRMS (ESI)  $m/z$  452.1605 [ $(\text{M}^+\text{H})^+$ ; calcd for  $\text{C}_{27}\text{H}_{22}\text{N}_3\text{O}_4^+$  ( $\text{M}^+\text{H})^+$ : 452.1610].

**Determination of optical purity:** Marfey's reagent (1-fluoro-2-4-dinitrophenyl-5-L-alanine amide) was used as a solution in acetone (33 mM). In a 2 mL vial, the amino acid (racemic amino acid that was obtained by the hydrolysis (1M LiOH in THF- $\text{H}_2\text{O}$ ) of compound **4** or crude L-amino acid from the above resolution (0.5  $\mu\text{mol}$ ) was dissolved in 1 M aqueous  $\text{NaHCO}_3$  (140  $\mu\text{L}$ ). Marfey's reagent (60  $\mu\text{L}$ , 2  $\mu\text{mol}$ ) was added, then the vial was placed in incubator (rpm 900) at 37 °C. After 1 h, the reaction mixture was allowed to cool to rt and then diluted with 1:1 water /acetonitrile (550  $\mu\text{L}$ ) and analyzed by HPLC [solvent A (0.1% TFA in water) and B (0.1% TFA, 1% water in acetonitrile), Vydac<sup>®</sup> 214TP, 5 $\mu\text{m}$ , C4, 300Å, 4.6 mm i.d. x 250 mm), wavelength 330 nm with a gradient of 5–95% B over 35 min].

**Solid-phase peptide synthesis of L-4CN-Trp labeled pHLIP:** The sequence synthesized:  $\text{NH}_2$ -GGEQNPIYW<sub>CN</sub>ARYADWLFTTPLL<sub>LDL</sub>LALLVDADEGT-CO<sub>2</sub>H, where W<sub>CN</sub> stands for L-4CN-Trp. The peptide was synthesized on a 0.1 mmol scale on the preloaded Thr(OtBu)-HMPB-ChemMatrix resin (0.5 meq/g) using a Biotage Initiator + Alstra peptide synthesizer. The deprotection was carried out for 5 min at 70 °C with 4.5 mL 20% 4-methylpiperidine in DMF. A standard coupling step (for all amino acids except for Fmoc-protected 4-CN-Trp) was done for 5 min at 75 °C with 5 equivalents of Fmoc-protected amino acids, 4.98 equivalents of HCTU, and 10 equivalents of DIPEA (relative to the amino groups on resin) in DMF. For L-Fmoc-protected 4-CN-Trp, a coupling reaction was done for 5 min at 75 °C with 1.5 equivalents of Fmoc-protected amino acids, 1.49 equivalents of HCTU, and 3 equivalents of DIPEA (relative to the amino groups on resin) in DMF. Peptide cleavage was carried out in the presence of TFA//TIS/ $\text{H}_2\text{O}$  (95:2.5:2.5, v/v) for 2 h at rt. The crude peptide was obtained after precipitation in cold diethyl ether and purified by RP-HPLC. (Vydac C4 214TP1022) using solvent A (0.1% TFA in water) and B (0.1% TFA, 1% water in acetonitrile). After 5 min equilibration with 5% B at a flow rate of 5 mL/min, a gradient of 5–70% B in 35 min was used. The chemical entity and purity of synthesized peptides were verified by a Shimadzu AXIMA MALDI-TOF mass spectrometer and an HP 1100 analytical HPLC system, respectively. MS (MALDI-TOF):  $m/z$  4077.73 (calcd [ $\text{M}^+\text{H}]^+$  = 4077.51).

**Solid-phase peptide synthesis of Ac-Gly-L-4CN-Trp-Gly:** The peptide was synthesized on a 0.05 mmol scale using a Biotage Initiator+ Alstra peptide synthesizer. A typical solid-phase peptide synthesis reaction cycle includes Fmoc deprotection, washing, coupling, and post-coupling washing steps. The deprotection step was carried out for 5 min at 70 °C with 4.5 mL 20% 4-methylpiperidine in DMF. A standard coupling step (for all amino acids except for Fmoc-protected L-4CN-Trp) was done for 5 min at 75 °C with 5 equivalents of Fmoc-protected amino acids, 4.98 equivalents of HCTU, and 10 equivalents of DIPEA (relative to the amino groups on resin) in DMF. For Fmoc-protected L-4CN-Trp, a coupling reaction was done for 5 min at 75 °C with 1.5 equivalents of Fmoc-protected amino acids, 1.49 equivalents of HCTU, and 3 equivalents of DIPEA (relative to the amino groups on resin) in DMF. Acetylation was done by using 5 equivalents of Ac<sub>2</sub>O and 10 equivalents of DIPEA. Peptide cleavage was carried out in the presence of TFA/TIS/H<sub>2</sub>O (95:2.5:2.5, v/v) for 2 h at rt. The crude peptide was obtained after precipitation in cold diethyl ether. The chemical entity and purity of synthesized peptides were verified by a Shimadzu mass spectrometer and an HP 1100 analytical HPLC system, respectively. MS (ESI): m/z 385.3 (calcd [M<sup>+</sup>H]<sup>+</sup> = 385.4).

**Cell culture:** HeLa cells were grown overnight at 37 °C on slides to about 60% confluency in DMEM medium containing 10% FBS and 4 mM L-Glutamine. At that point the supernatant was aspirated and 0.5 mL of a stock 4CN-Trp-pHLIP solution (in PBS buffer at the desired pH) was added to each slide with a final peptide concentration of 10 μM. Then the peptide treated cells were incubated at rt for 1 h, followed by washing with the corresponding PBS buffer 3× and fixed for 30 minutes with 2% formaldehyde in the corresponding PBS. Subsequently, each slide was again washed 3× with the corresponding PBS buffer and air-dried. Finally, two drops of 50% glycerol were then added to each slide, which was covered with a cover slip and the edges were sealed with clear nail polish.

**Cell imaging:** Cell images were acquired on a commercial widefield fluorescence microscope (Leica DM6000) equipped with a 20X dry objective using a standard DAPI filter (excitation bandwidth: 325 – 375 nm, emission bandwidth: 435 nm – 485 nm). The integration time for each image was 50 ms and data/image processing was carried out using ImageJ 1.5 software.<sup>2</sup>

**Preparation of large unilamellar vesicles (LUVs):** The 100-nm LUVs used in the peptide-membrane binding experiments were composed of 99% POPC (purchased from Avanti Polar Lipids Inc., AL) and 1% of

3,3'-dioctadecyloxacarbocyanine perchlorate (DiO, purchased from Thermo Fisher Scientific), which were prepared following previously published procedures.<sup>3</sup> Briefly, an appropriate amount of DiO was added to a stock lipid solution in chloroform and the resultant mixture was put to shake at rt for 30 minutes. This lipid solution was then allowed to dry under a flow of nitrogen to form a lipid film, which was followed by a 30-minute lyophilization to remove any remaining solvent. The resultant lipid film was then rehydrated in the desired buffers. This sample was then subjected to 7 rounds of slow vortexing, freezing and thawing. The resulting vesicle solution was then extruded 11 times through an extruder (Avanti Polar Lipids Inc., AL) equipped with a 100 nm membrane. After extrusion, the LUV solution was diluted to 1.0 mM (lipid concentration) with desired buffers.

**Fluorescence measurements:** All fluorescence spectra were collected on a Jobin Yvon Horiba Fluorolog 3.10 spectrofluorometer using a 1 cm quartz cuvette with a 1.0 nm resolution, 1 nm excitation/emission slit, an integration time of 1.0 nm/s, and an excitation wavelength of 320 nm at 20°C. Fit for fluorescence binding curve is detailed in the SI.

**Förster distance calculation:** The Förster distance ( $R_0$ ) of the FRET pair, L-4CN-Trp (donor) and DiO (acceptor), is calculated using the following equation:<sup>4</sup>

$$R_0^6 = \left( \frac{9000(\ln 10)\kappa^2 Q_D}{128\pi^5 N \eta^4} \right) J(\lambda), \quad (1)$$

where  $\kappa^2$  is the orientation factor, assumed to be 2/3,  $Q_D$  is the fluorescence quantum yield of the donor in the absence of the acceptor which is 0.85 for L-4CN-Trp,  $N$  is the Avogadro's number,  $\eta$  is the refractive index of the medium (1.33 for MeOH), and  $J(\lambda)$  is the overlap integral, determined by the following equation:<sup>1</sup>

$$J(\lambda) = \int_0^\infty F_D(\lambda) \varepsilon_A(\lambda) \lambda^4 d\lambda, \quad (2)$$

where  $F_D(\lambda)$  is the area-normalized emission spectrum of the donor and  $\varepsilon_A(\lambda)$  is the wavelength-dependent molar absorption coefficient of the acceptor.

**Data fitting:** The fluorescence binding curve (i.e., Figure 3), obtained from the intensity at 512 nm of the fluorescence spectrum of every peptide-membrane mixture (i.e., Figure S3), was fit to the following membrane binding model:<sup>3</sup>

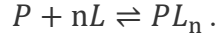

where P and L represent peptide and lipid, respectively. Following Engelman and coworkers,<sup>5</sup> we assumed that  $n = 50$  (i.e., every membrane-bound peptide is solvated by 50 lipids). For a given set of initial peptide ( $[P_0]$ ) and lipid ( $[L_0]$ ) concentrations, one can easily show that the equilibrium concentration of  $PL_n$  ( $[PL_n]_{eq}$ ) is:

$$[PL_n]_{eq} = \frac{(K_d + [P_0] + [L_0]^*) - \sqrt{(K_d + [P_0] + [L_0]^*)^2 - 4[P_0][L_0]^*}}{2}, \quad (3)$$

where  $K_d$  is the dissociation equilibrium constant and  $[L_0]^* = [L_0]/50$ . Because only the membrane-bound peptides can contribute to the observed FRET signal, the binding curve can be described by the following equation:

$$I = I_m \times [PL_n]_{eq}. \quad (4)$$

In the fitting,  $K_D$  and  $I_m$  were treated as variables.



**Table S1. Summary of reported syntheses of 4CN-Trp and its derivatives.**

| Reference                                                 | Key reaction                                                                       | Advantages                                                                                                        |
|-----------------------------------------------------------|------------------------------------------------------------------------------------|-------------------------------------------------------------------------------------------------------------------|
| <i>J. Org. Chem.</i> , 2018, <b>83</b> , 7447.            | <p>TrpB variant, aqueous buffer</p>                                                | Green chemistry, use of readily available starting material, high enantiomeric purity                             |
| <i>J. Am. Chem. Soc.</i> , 2017, <b>139</b> , 10769.      | <p>TrpB variant</p> <p>&gt;20 Trp analogs<br/>up to 99% yield<br/>up to 99% ee</p> | Green chemistry, use of readily available starting material, synthesis of Trp analogues with various substitution |
| <i>Angew. Chem., Int. Ed.</i> , 2018, <b>57</b> , 6830.   | <p>StTrpS<br/>PLP</p>                                                              | Green chemistry, use of readily available starting material, high enantiomeric purity                             |
| <i>Org. Biomol. Chem.</i> , 2016, <b>14</b> , 10095.      | <p>Suzuki-Miyaura</p>                                                              | Gram-scale and rapid synthesis                                                                                    |
| <i>Phys. Chem. Chem. Phys.</i> , 2018, <b>20</b> , 19906. | <p>Ac<sub>2</sub>O, AcOH<br/>rt</p> <p>CN at 4- or 5-position</p>                  | Facile method to synthesis a variety of Trp derivatives                                                           |

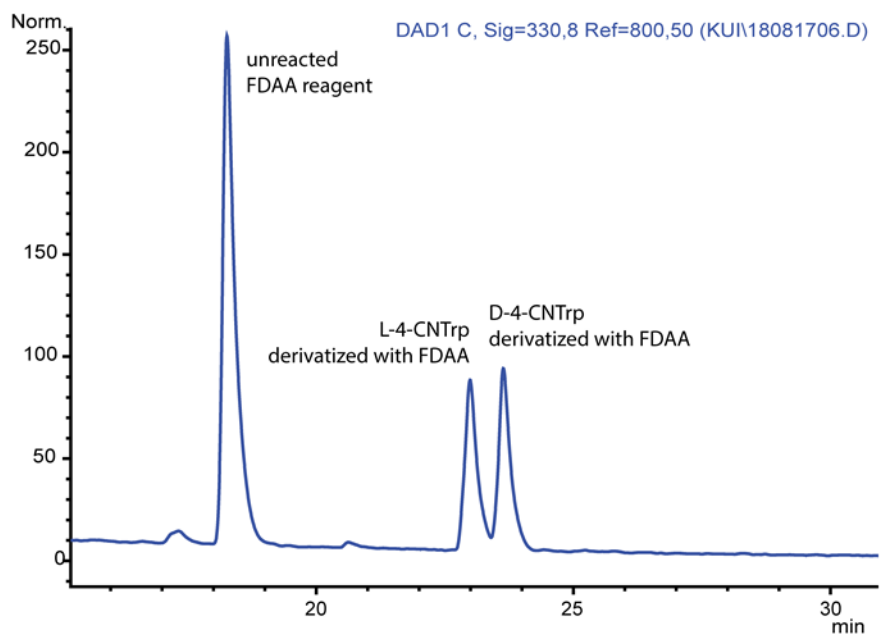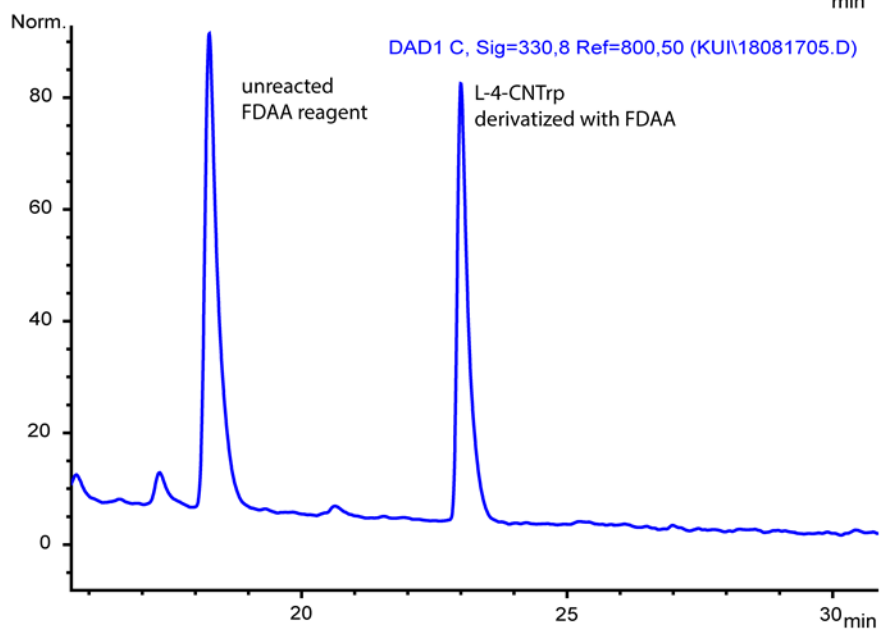

**Figure S1.** HPLC profile of FDAA derivatized racemic 4CN-Trp (Top) and L-4CN-Trp (Bottom).

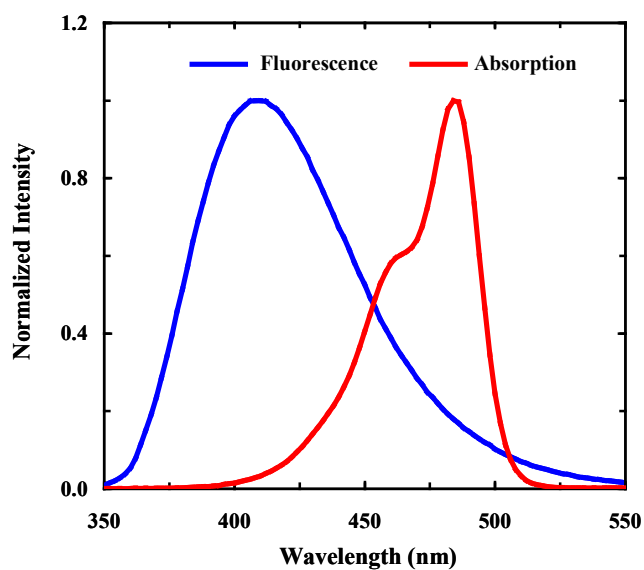

**Figure S2.** Normalized fluorescence spectrum of L-4CN-Trp (blue) and absorption spectrum of DiO (red) in methanol.

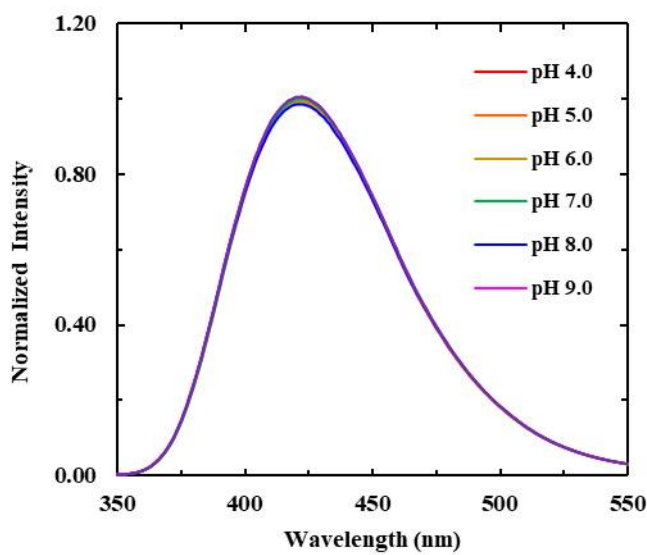

**Figure S3.** Normalized fluorescence spectra of Ac-G-L-4CN-Trp-G at different pH values (as indicated), using the spectrum obtained at pH 7.0 as the reference. The concentration was 10  $\mu$ M for each sample and the excitation wavelength was 320 nm.

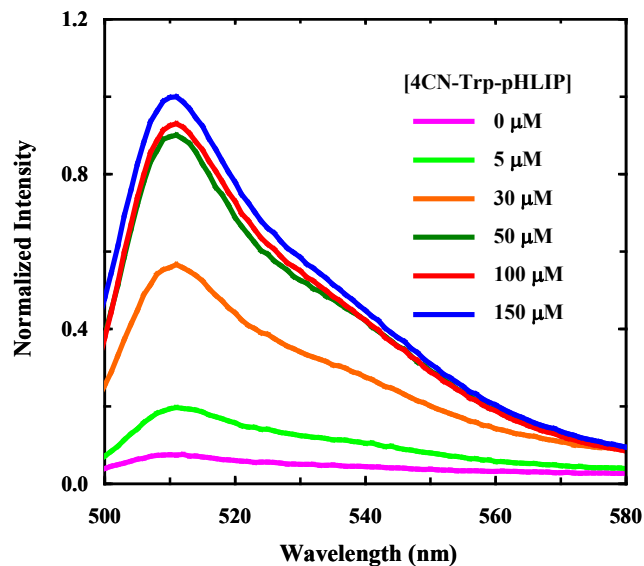

**Figure S4.** Normalized fluorescence spectra (in the DiO emission wavelength region) of mixtures of DiO-stained POPC (1.0 mM) LUVs and 4CN-Trp-pHLIP of different concentrations, as indicated. The excitation wavelength was 320 nm.

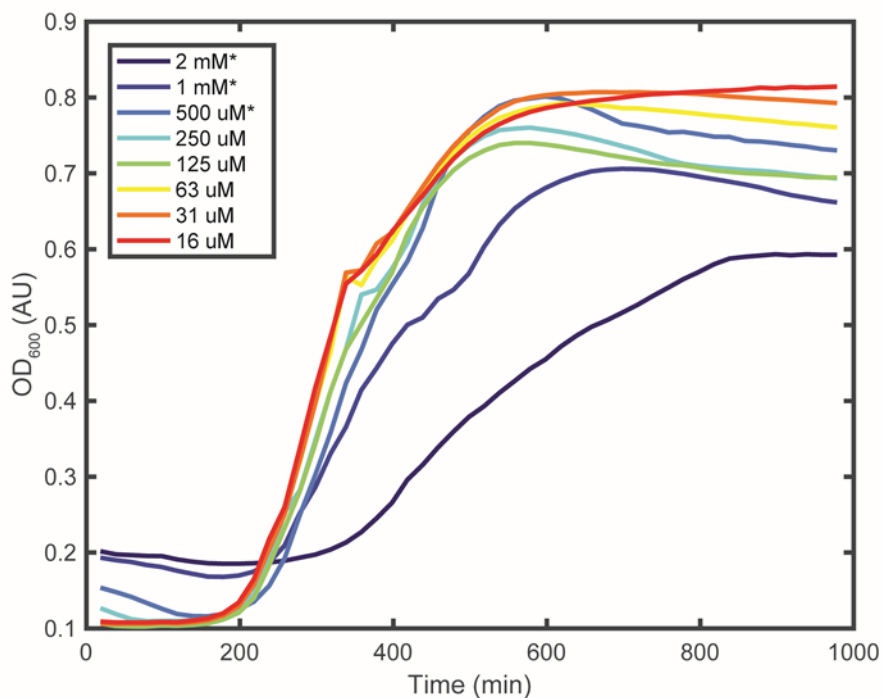

**Figure S5.** *E. coli* growth curves in the presence of different concentrations of L-4CN-Trp, which suggest that at concentrations of below 250  $\mu\text{M}$ , L-4CN-Trp has no significant effect on the growth of *E. coli* cells. It is worth noting that for experiments carried out at higher concentrations, marked with an asterisk (\*), the results are not conclusive because the poor solubility of the compound at these concentrations.

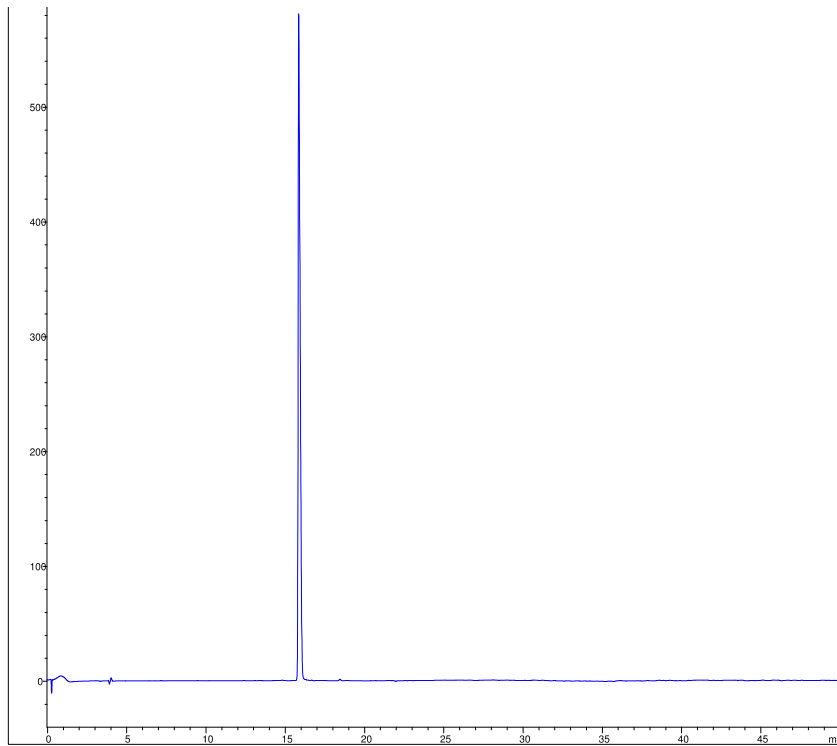

Figure S6. HPLC profile of purified L-4CN-Trp 7.

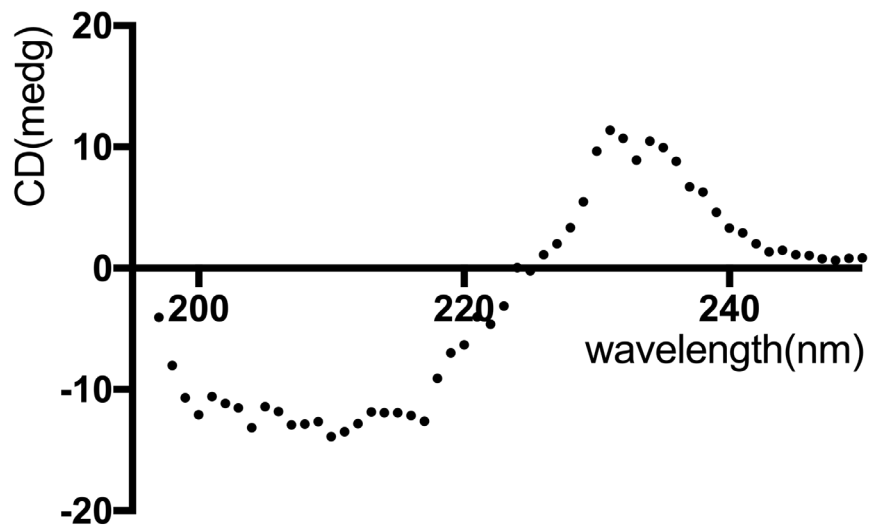

Fig S7. CD spectrum of L-4CN-Trp 7 (2 mM, in 0.1 M HCl)

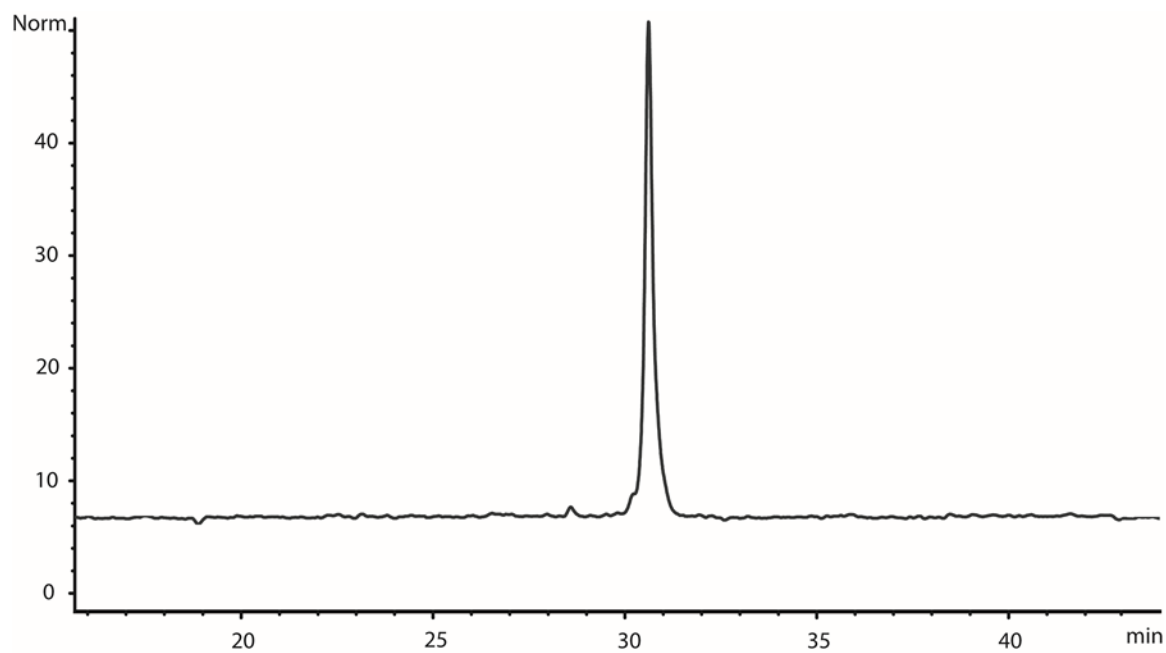

**Figure 8.** HPLC profile of purified 4CN-Trp-pHLIP

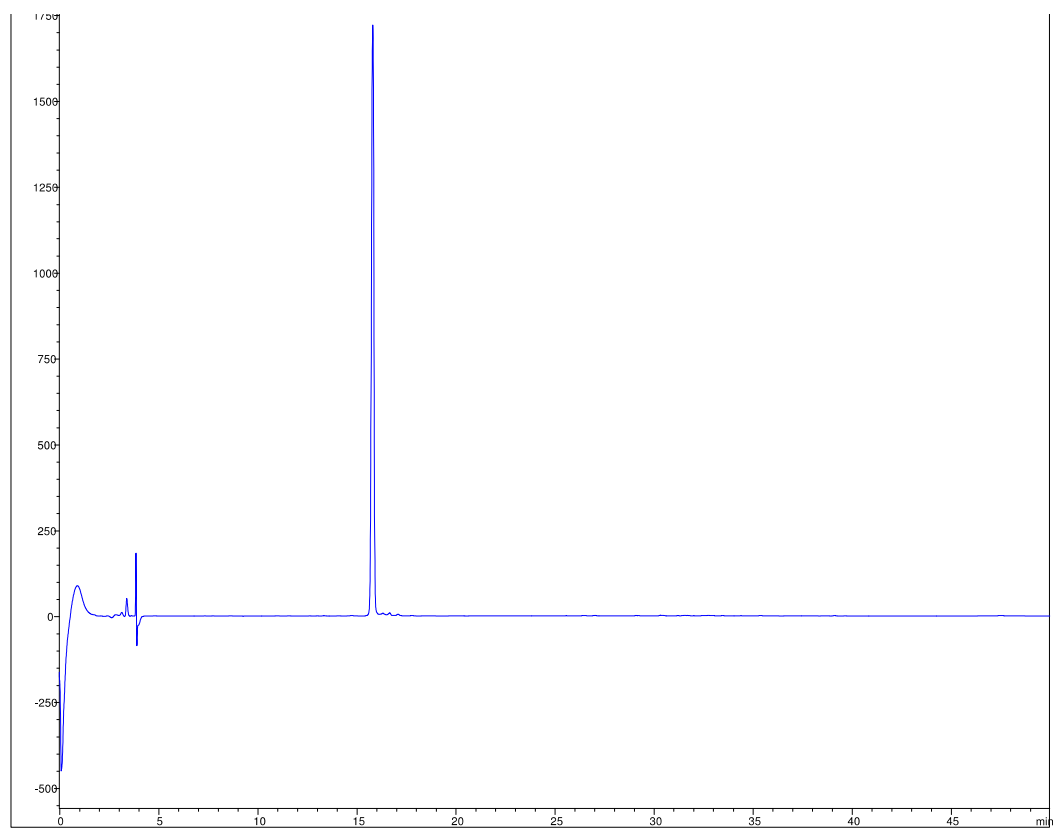

**Figure 9.** HPLC profile of purified Ac-G-L-4CN-Trp-G.

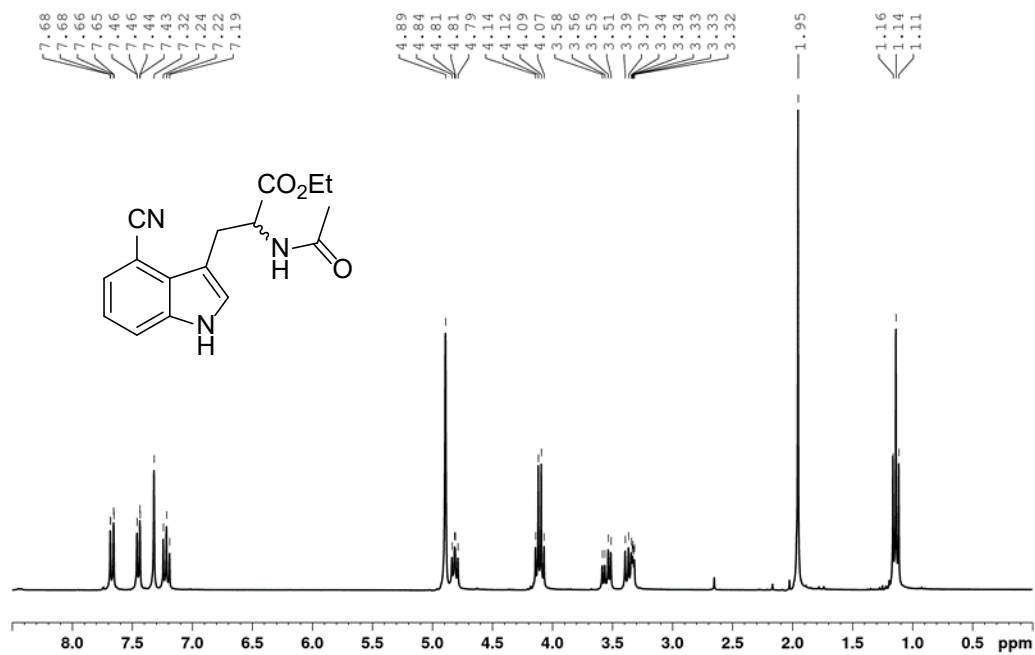

<sup>1</sup>H NMR spectrum of 5

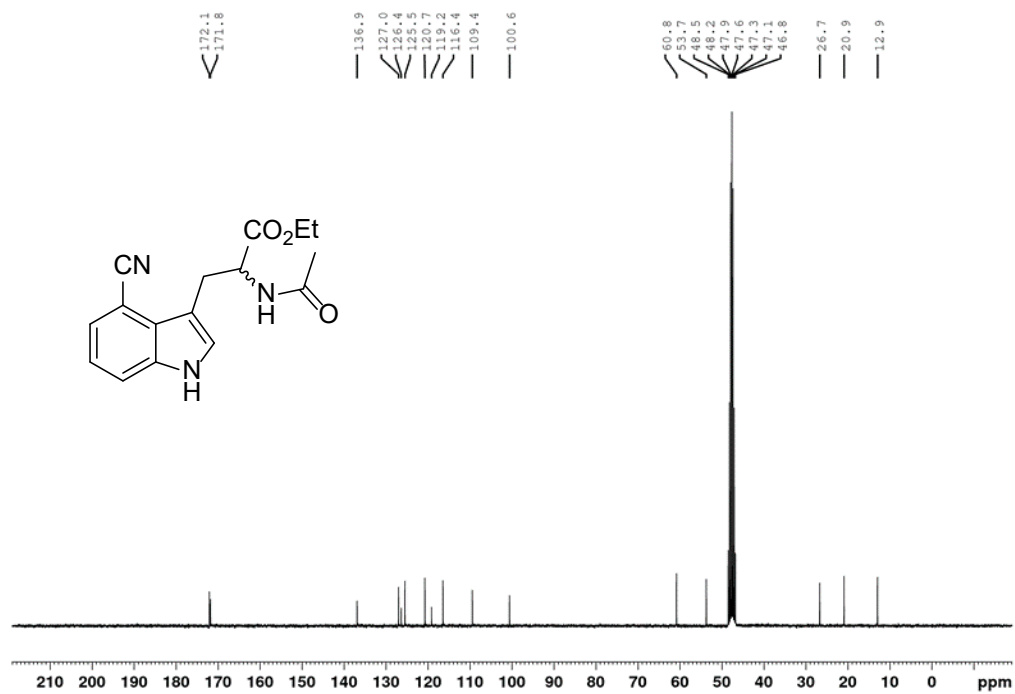

<sup>13</sup>C NMR spectrum of 5

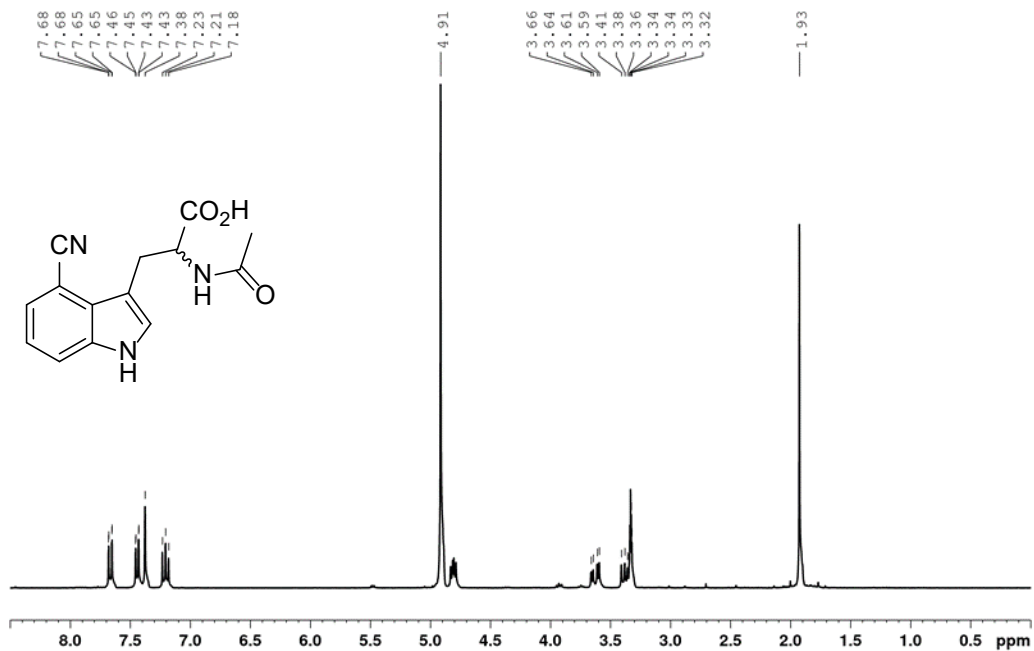

$^1\text{H}$  NMR spectrum of **6**

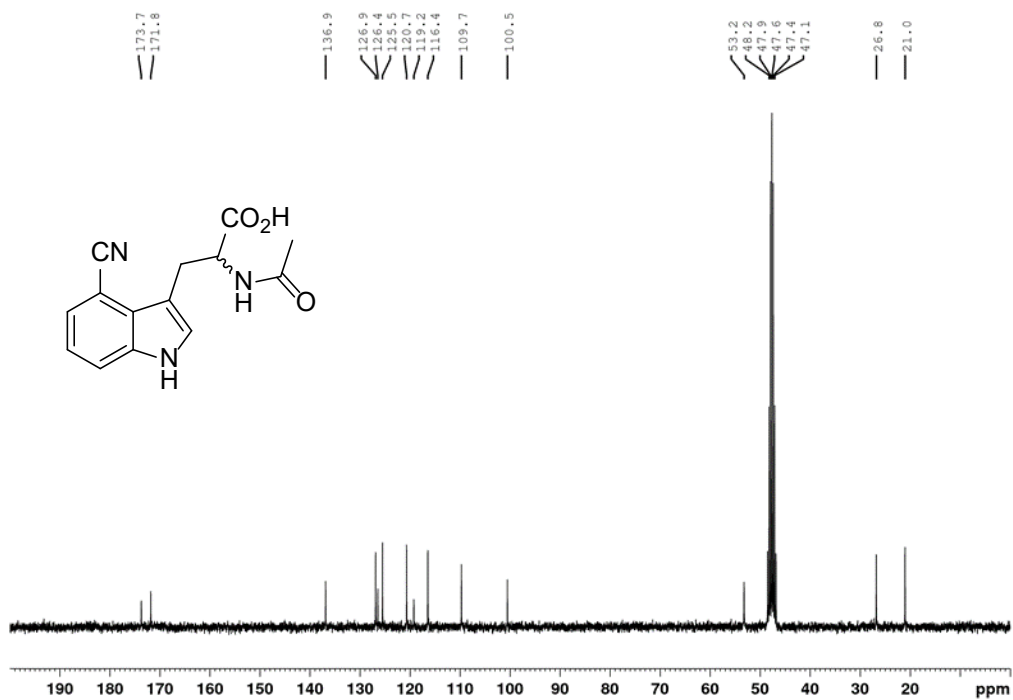

$^{13}\text{C}$  NMR spectrum of **6**



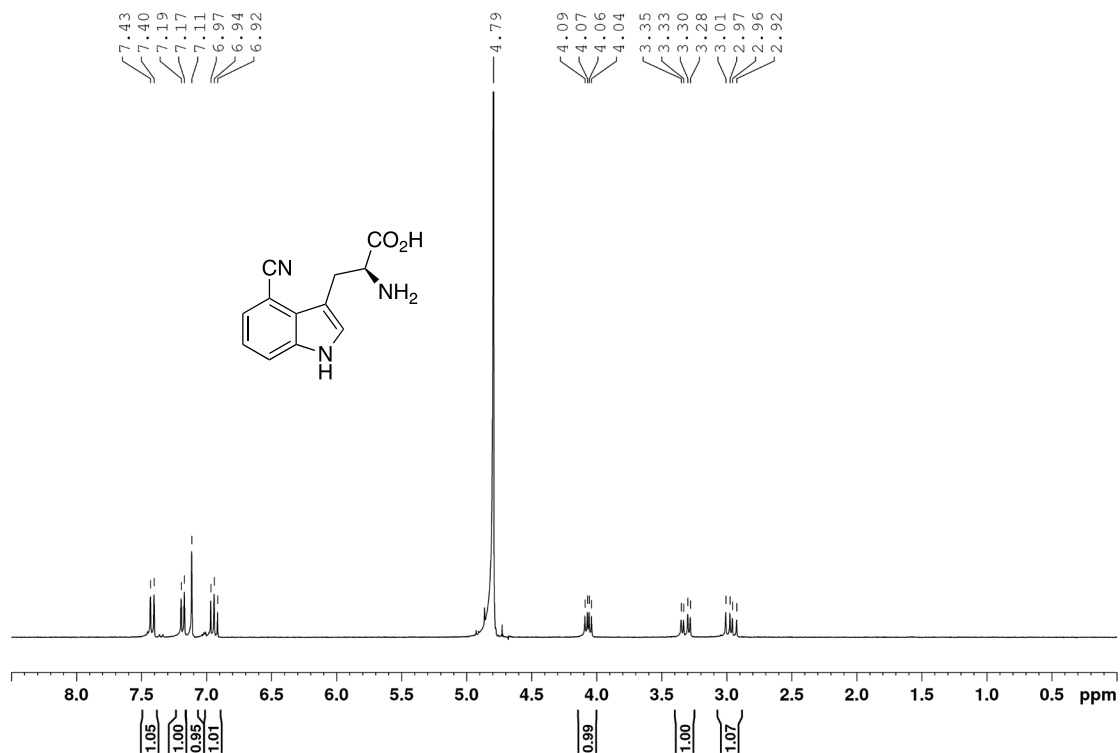

<sup>1</sup>H NMR spectrum of 7

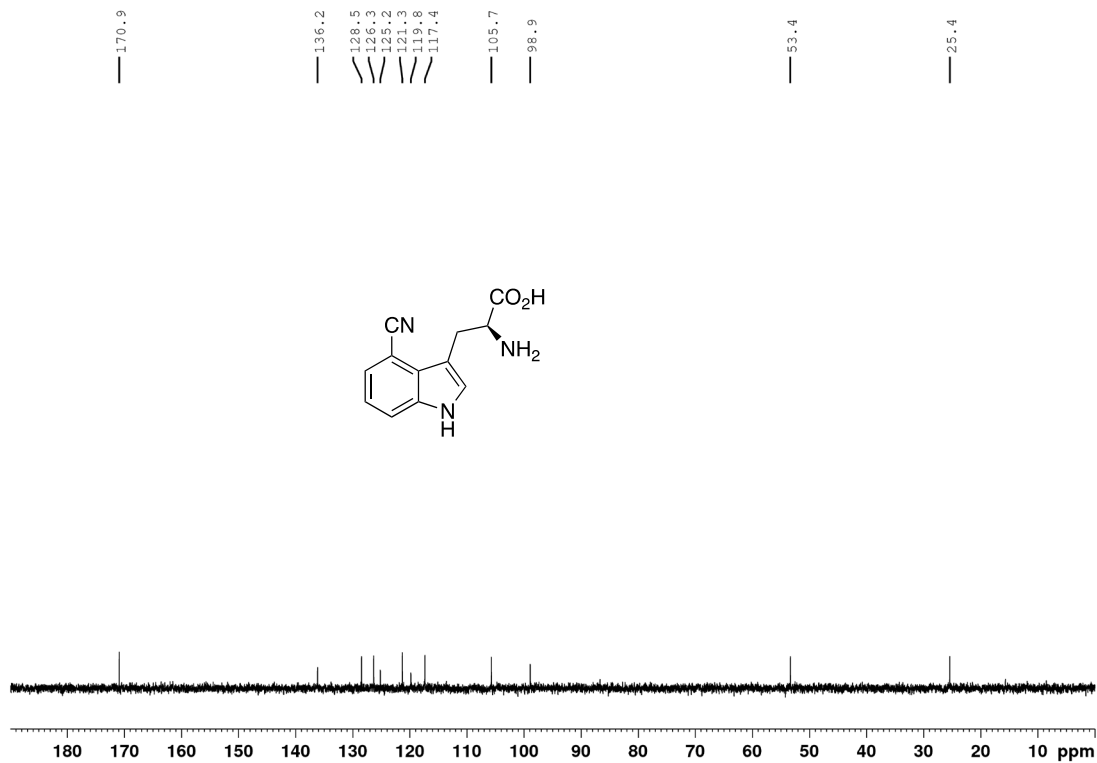

<sup>13</sup>C NMR spectrum of 7

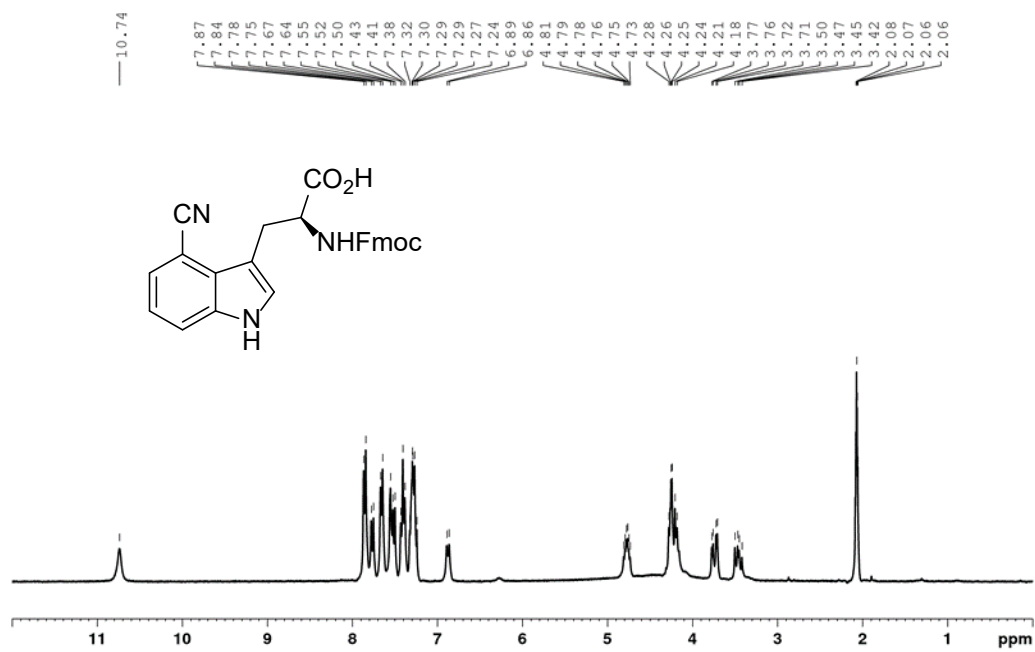

<sup>1</sup>H NMR spectrum of **8**

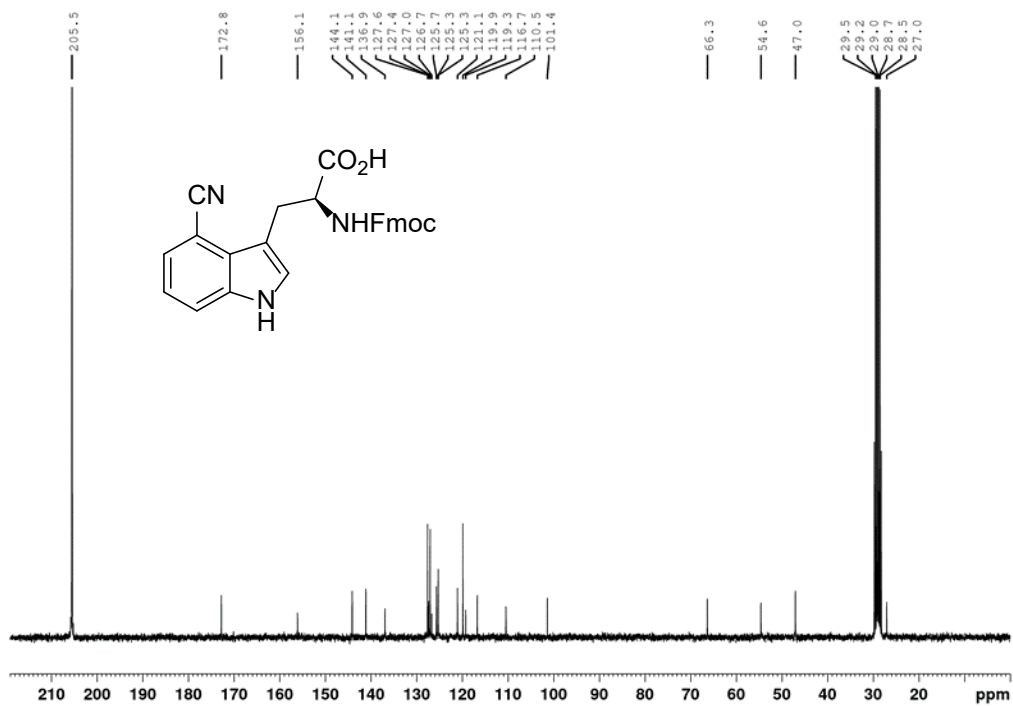

<sup>13</sup>C NMR spectrum of **8**

## References

1. L. L. Guo, Jian; Nargund, Ravi P.; Pasternak, Alexander; Yang, Lihu; Ye, Zhixiong, *PCT Int. Appl.*, 2010051177, 06 May 2010
2. M. Winn, D. Francis and J. Micklefield, *Angew. Chem., Int. Ed.*, 2018, **57**, 6830.
3. C. A. Schneider, W. S. Rasband and K. W. Eliceiri, *Nat Methods*, 2012, **9**, 671.
4. T. S. Aurora, W. Li, H. Z. Cummins and T. H. Haines, *Biochim Biophys Acta*, 1985, **820**, 250.
5. J. R. Lakowicz, *Principles of Fluorescence Spectroscopy*, Springer: New York, USA 2nd edn., 1999.
6. Y. K. Reshetnyak, O. A. Andreev, M. Segala, V. S. Markin and D. M. Engelman, *Proc Natl Acad Sci U S A*, 2008, **105**, 15340.
